# Supplementary material for: Altered microRNA expression in COVID-19 patients enables identification of SARS-CoV-2 infection
Source: Research Square preprint supplement (doi:10.21203/rs.3.rs-253459/v1), 2021-02-24
Supplement: Supplementary file 2 [file 72d99fcec7913b32796850b9.docx]

**Supplementary Information**

**Altered microRNA expression in COVID-19 patients enables identification of SARS-CoV-2 infection**

Ryan J. Farr1, Christina L. Rootes1, Louise C. Rowntree2, Thi H.O. Nguyen2, Luca Hensen2, Lukasz Kedzierski2,5, Allen C. Cheng3,4, Katherine Kedzierska2,6, Gough G. Au1, Glenn A. Marsh1, Seshadri S. Vasan1, Chwan Hong Foo7, Christopher Cowled1, Cameron R. Stewart1#

1. CSIRO Health & Biosecurity, Australian Centre for Disease Preparedness, Private bag 24, Geelong 3220, Victoria, Australia
2. Department of Microbiology and Immunology, University of Melbourne, at the Peter Doherty Institute for Infection and Immunity, Melbourne 3000, Victoria, Australia.
3. School of Public Health and Preventive Medicine, Monash University, Melbourne, Victoria, Australia.
4. Infection Prevention and Healthcare Epidemiology Unit, Alfred Health, Melbourne, Victoria, Australia.
5. Faculty of Veterinary and Agricultural Sciences, University of Melbourne, Melbourne, Victoria, Australia.
6. Global Station for Zoonosis Control, Global Institution for Collaborative Research and Education (GI-CoRE), Hokkaido University, Sapporo, Japan
7. Exios Bio LLC, Conshohocken, PA, USA.

#Correspondence to Cameron R. Stewart, CSIRO Health & Biosecurity, Australian Centre for Disease Preparedness, Private Bag 24, Geelong 3220, Victoria, Australia. [cameron.stewart@csiro.au](mailto:cameron.stewart@csiro.au).


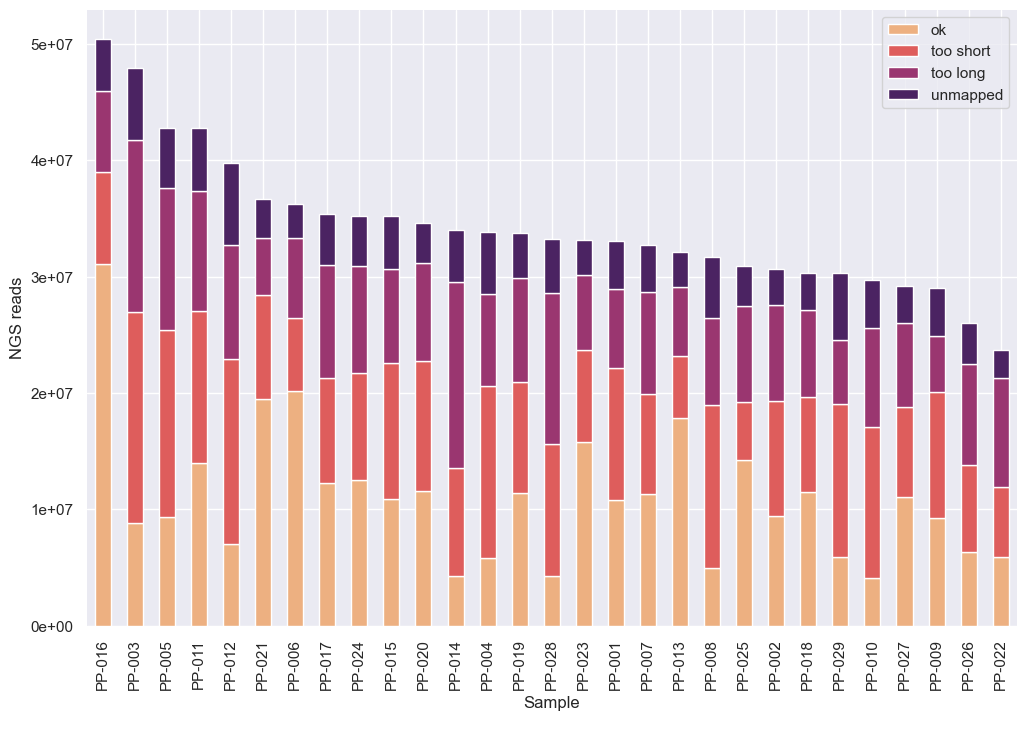


**Supplementary Figure 1:** After adaptor trimming, reads that fell outside the expected size range for miRNAs (18-26 nt) were filtered out, as were reads that failed to map to a miRNA precursor.

**Supplementary Table 1.** Differentially expressed miRNAs in V1 COVID-19 patients

| MicroRNA | Log2 Fold Change | P-value | Adjusted P-value |
| --- | --- | --- | --- |
| hsa-miR-766-3p | -3.21286 | 6.44E-10 | 2.95E-07 |
| hsa-miR-651-5p | -4.21545 | 2.75E-06 | 0.000631 |
| hsa-miR-1275 | -5.48443 | 8.11E-06 | 0.001241 |
| hsa-let-7e-5p | 1.377425 | 2.34E-05 | 0.002687 |
| hsa-miR-3198 | -3.78907 | 3.12E-05 | 0.002869 |
| hsa-miR-195-5p | 2.358879 | 4.38E-05 | 0.003354 |
| hsa-miR-627-5p | -4.48848 | 6.23E-05 | 0.003576 |
| hsa-miR-4662a-5p | -2.50778 | 5.95E-05 | 0.003576 |
| hsa-miR-3684 | -4.76149 | 0.000173 | 0.007946 |
| hsa-let-7a-5p | 1.0124 | 0.000169 | 0.007946 |
| hsa-miR-483-5p | 2.550091 | 0.000205 | 0.008575 |
| hsa-miR-3125 | 6.252678 | 0.000229 | 0.00876 |
| hsa-miR-3617-5p | -5.45059 | 0.00035 | 0.010311 |
| hsa-miR-500b-3p | -4.96428 | 0.000494 | 0.010311 |
| hsa-miR-664b-3p | -4.05027 | 0.000298 | 0.010311 |
| hsa-miR-5189-3p | -3.84697 | 0.000485 | 0.010311 |
| hsa-miR-6772-3p | -3.63046 | 0.000421 | 0.010311 |
| hsa-miR-145-3p | -3.58149 | 0.000462 | 0.010311 |
| hsa-miR-30a-5p | 1.134764 | 0.00039 | 0.010311 |
| hsa-miR-27a-5p | 4.318811 | 0.000442 | 0.010311 |
| hsa-miR-2116-3p | 4.390754 | 0.000432 | 0.010311 |
| hsa-miR-31-5p | 6.509967 | 0.000316 | 0.010311 |
| hsa-miR-4772-3p | -3.69055 | 0.000521 | 0.010403 |
| hsa-miR-1290 | 2.351267 | 0.00059 | 0.011278 |
| hsa-miR-1226-3p | -3.93577 | 0.000726 | 0.013326 |
| hsa-miR-589-3p | -4.13788 | 0.000789 | 0.013412 |
| hsa-miR-210-3p | -3.42172 | 0.000776 | 0.013412 |
| hsa-miR-103a-3p | 0.759379 | 0.00082 | 0.013436 |
| hsa-miR-3115 | -4.1628 | 0.000968 | 0.015325 |
| hsa-miR-769-3p | -3.94101 | 0.001136 | 0.015806 |
| hsa-miR-320b | 1.367456 | 0.001052 | 0.015806 |
| hsa-miR-193a-5p | 2.618751 | 0.00112 | 0.015806 |
| hsa-miR-206 | 3.499758 | 0.001136 | 0.015806 |
| hsa-miR-873-5p | -3.89657 | 0.001308 | 0.017152 |
| hsa-miR-148a-3p | 1.076395 | 0.001274 | 0.017152 |
| hsa-miR-3913-5p | -3.46608 | 0.00142 | 0.017672 |
| hsa-miR-320a-3p | 0.881589 | 0.001425 | 0.017672 |
| hsa-miR-576-5p | 1.606005 | 0.00148 | 0.017882 |
| hsa-miR-197-3p | 1.427729 | 0.001568 | 0.018452 |
| hsa-miR-4742-3p | 5.005176 | 0.001674 | 0.019211 |
| hsa-miR-423-5p | 0.869915 | 0.00177 | 0.019812 |
| hsa-miR-28-5p | -2.90744 | 0.001873 | 0.020377 |
| hsa-miR-320c | 1.316571 | 0.001909 | 0.020377 |
| hsa-miR-551b-3p | -2.99277 | 0.002173 | 0.022674 |
| hsa-miR-142-3p | 1.127168 | 0.00223 | 0.022748 |
| hsa-let-7i-3p | -2.711 | 0.00251 | 0.025046 |
| hsa-miR-92a-3p | 0.995885 | 0.002748 | 0.026838 |
| hsa-miR-548k | -4.01054 | 0.002948 | 0.02819 |
| hsa-miR-18a-3p | -4.18347 | 0.00305 | 0.028575 |
| hsa-miR-491-5p | -2.72341 | 0.003523 | 0.032344 |
| hsa-miR-6721-5p | 2.649822 | 0.003784 | 0.034055 |
| hsa-miR-6503-3p | -3.44108 | 0.004569 | 0.040326 |
| hsa-miR-3065-3p | -3.16935 | 0.005048 | 0.043718 |
| hsa-miR-150-5p | -1.06201 | 0.005553 | 0.046345 |
| hsa-let-7f-5p | 0.824654 | 0.005516 | 0.046345 |


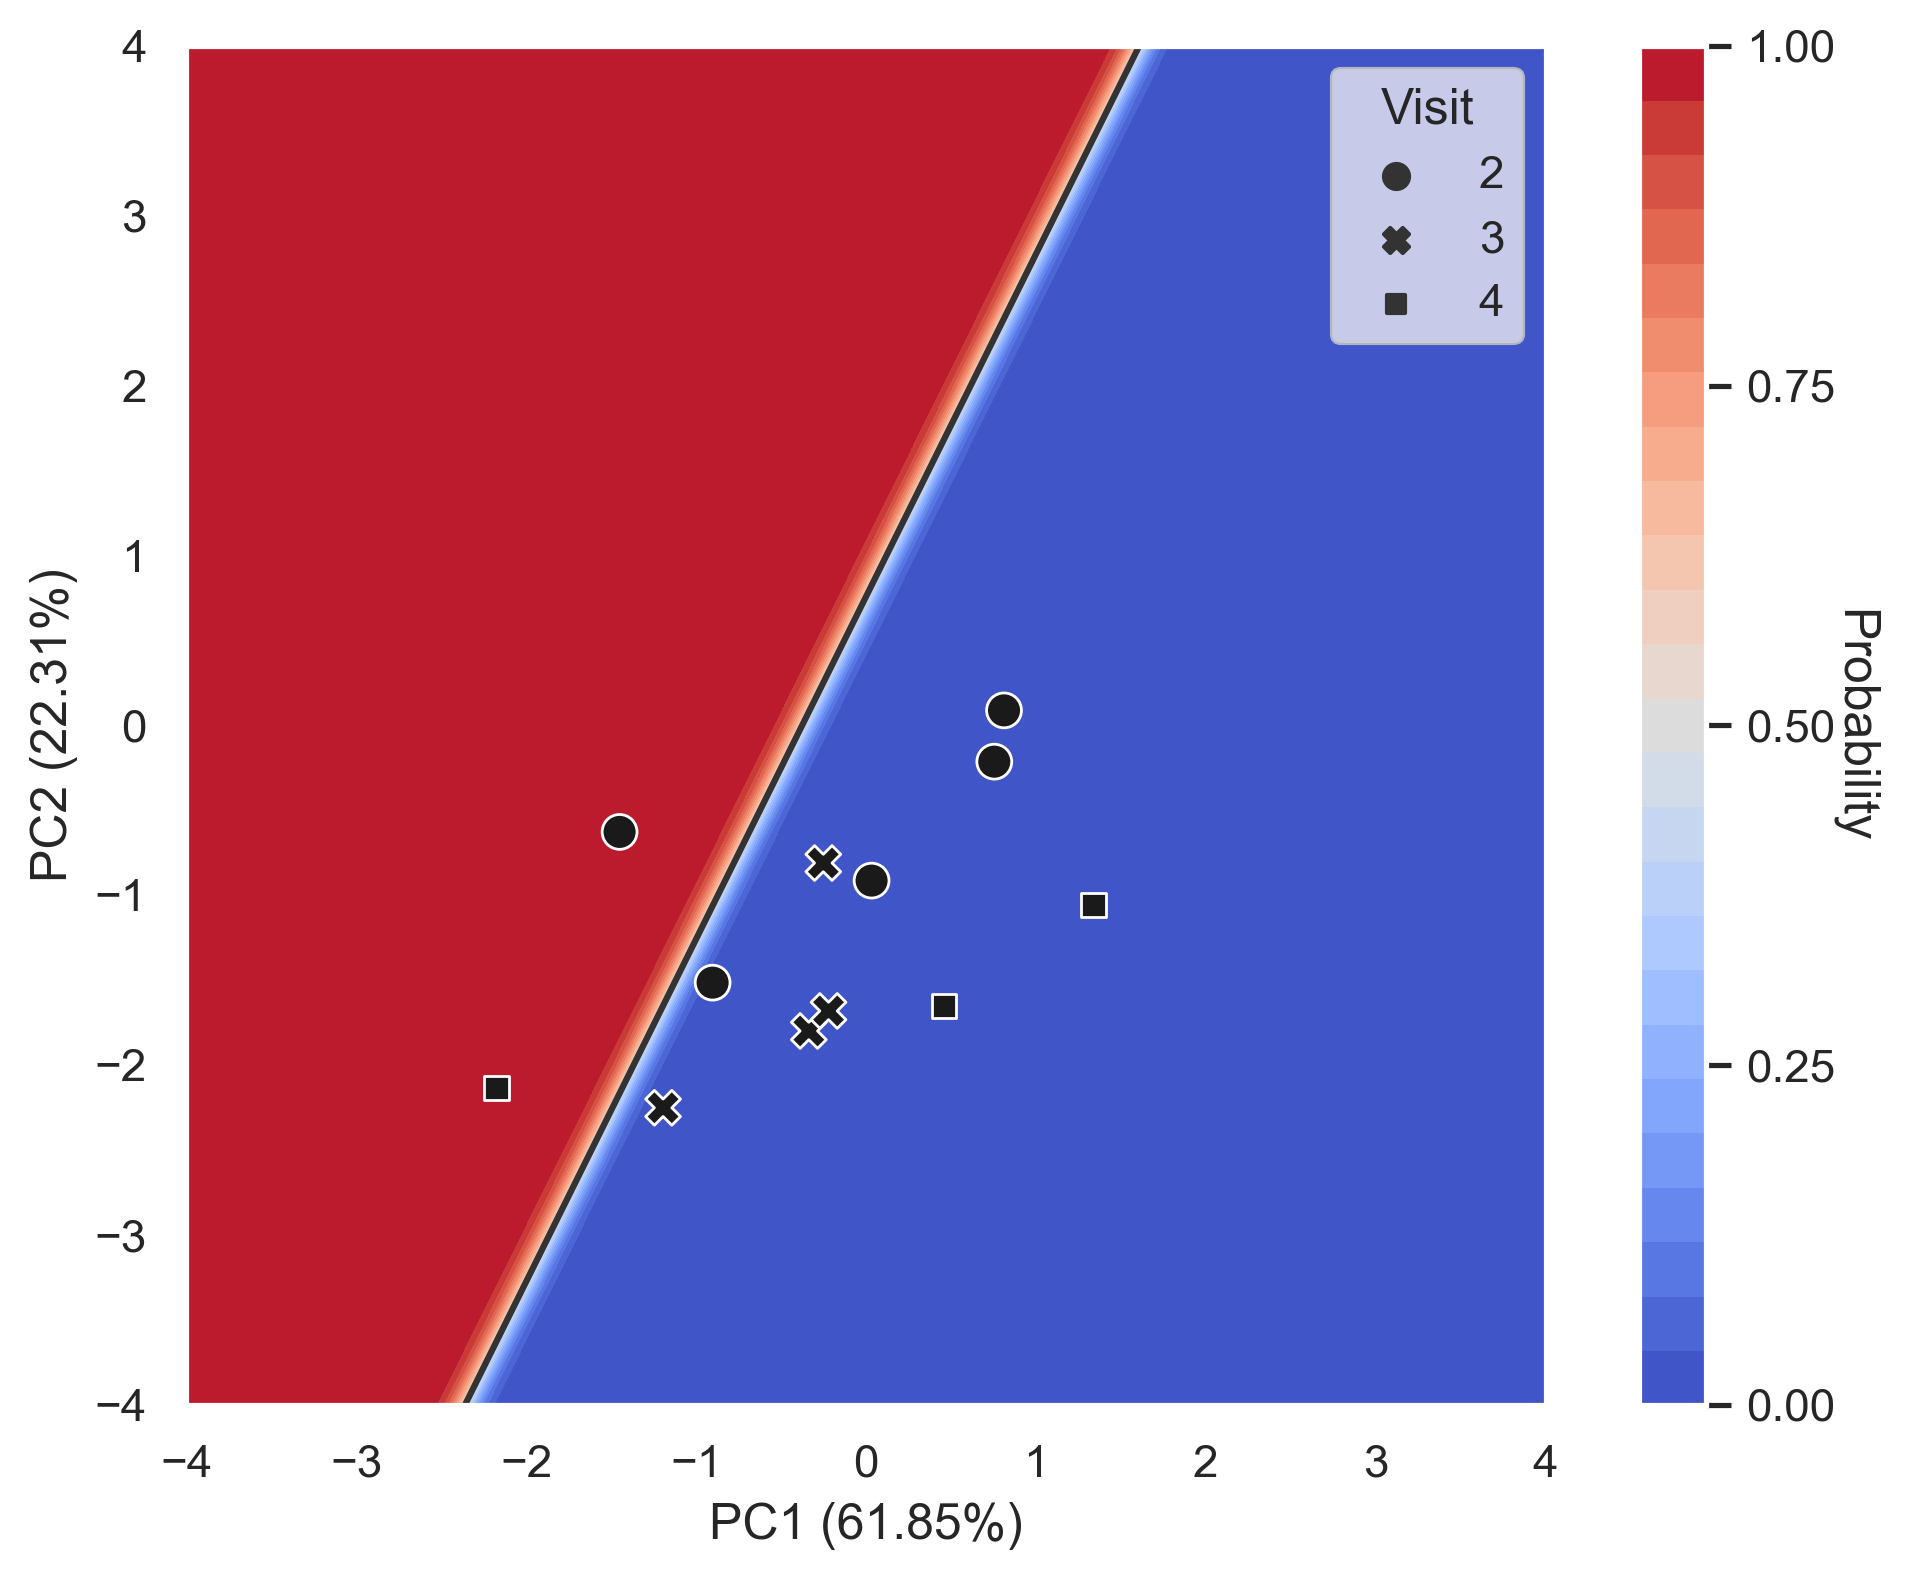


**Supplementary Figure 2.** Application of the V1 COVID-19 miRNA signature to subsequent time points. Decision boundary graph showing the logistic regression decision point (solid black line) and the probability a person is infected with SARS-CoV-2 (blue to red shading). Datapoints are COVID-19 patients at V2 (circles, n=5), V3 (crosses, n=4), and V4 (squares, n=3).

**Supplementary Table 2:** Human cytokine data

| Sample ID | Condition | Visit | IL-1β | IFNα2 | IFNγ | TNFα | MCP1 | IL-6 | IL-8 | IL-10 | IL-12 | IL-17a | IL-18 | IL-23 | IL-33 |
| --- | --- | --- | --- | --- | --- | --- | --- | --- | --- | --- | --- | --- | --- | --- | --- |
| PP-001 | COVID | 2 | 15.46 | 14.94 | 119.9 | 13.09 | 571.2 | 1.62 | 14.06 | 1.14 | 1.56 | <1.98 | 355.65 | 132.43 | <6.57 |
| PP-002 | COVID | 2 | 2.14 | <1.46 | 5.21 | <2.25 | 1185 | 10.98 | 18.36 | 337.96 | 1.6 | 3.32 | 262.69 | 6.16 | <6.57 |
| PP-003 | HEALTHY | 1 | 1.9 | 5.84 | 6.6 | 3.03 | 1559 | 5.97 | 8.41 | 1.17 | 2.02 | 15.99 | 186.72 | 3.68 | 964.37 |
| PP-004 | COVID | 1 | 5.09 | 17.01 | 29.48 | 42.68 | 730.19 | 35.52 | 13.81 | 8.44 | 6.02 | 24.87 | 183.12 | 9.17 | 89.38 |
| PP-005 | COVID | 3 | <1.21 | <1.46 | <1.11 | <2.25 | 459.94 | <1.24 | 39.84 | 1.17 | <1.44 | 2.13 | 8.17 | 6.16 | <6.57 |
| PP-006 | HEALTHY | 1 | <3.22 | <3.04 | <3.01 | 4.08 | 269.44 | 10.32 | 14.32 | 4.93 | 4.26 | 3.46 | 97.31 | <5.32 | <68.00 |
| PP-007 | COVID | 1 | 7.79 | 10.17 | 2.89 | 3.7 | 363.32 | <1.24 | 14.81 | <1.12 | 2.53 | 7.79 | 106.51 | 5.7 | <6.57 |
| PP-008 | COVID | 1 | <1.21 | 20.8 | 74.34 | 15.82 | 3493 | 32.54 | 14.56 | 7.56 | 2.1 | <1.98 | 718.84 | 4.43 | <6.57 |
| PP-009 | COVID | 3 | <3.75 | <4.55 | 39.97 | 6.81 | 1198 | 59.51 | 26.15 | 9.54 | <2.51 | 4.64 | 6967 | 20.7 | 31.29 |
| PP-010 | COVID | 2 | 4.52 | 10.1 | 36.35 | 46.68 | 2256 | 314.71 | 72.38 | 10.76 | 6.65 | 20.36 | 287.41 | 19.69 | 70.54 |
| PP-011 | HEALTHY | 1 | <1.21 | <1.46 | 2.7 | <2.25 | 1156 | <1.24 | 129.98 | <1.12 | <1.44 | <1.98 | 42.13 | 2.1 | <6.57 |
| PP-012 | HEALTHY | 1 | 24.38 | 7.29 | 75.08 | 11 | 528.48 | 7.85 | 35.95 | 11.25 | 7.71 | 22.64 | 144.68 | 147.71 | 97.97 |
| PP-013 | COVID | 4 | 4.93 | <1.46 | <1.11 | <2.25 | 1101 | 1.33 | 56.25 | <1.12 | 1.75 | 22.9 | 440.39 | 5.26 | <6.57 |
| PP-014 | HEALTHY | 1 | 5.7 | 4.09 | 6.85 | 71.12 | 496.84 | 3.23 | 12.35 | 5.23 | 7.57 | <2.25 | 126.32 | <5.32 | <68.00 |
| PP-015 | COVID | 1 | 20.22 | 20.67 | 140.57 | 20.73 | 223.86 | 13.53 | 23.28 | <1.12 | 4.17 | <1.98 | 920.08 | 325 | <6.57 |
| PP-016 | COVID | 3 | 16.54 | 15.91 | 97.65 | 9.44 | 509.95 | <1.24 | 8.9 | <1.12 | <1.44 | <1.98 | 142.27 | 224.55 | <6.57 |
| PP-017 | COVID | 3 | 4.71 | 14.55 | 20.23 | 33.33 | 733.33 | 7.62 | 13.81 | 7.7 | 6.12 | 17.09 | 76.38 | 11.5 | 56.93 |
| PP-018 | COVID | 2 | <3.75 | <4.55 | 53.14 | <4.91 | 1276 | 22.82 | 15.81 | 19.8 | <2.51 | <3.75 | 413.19 | <6.87 | <24.64 |
| PP-019 | HEALTHY | 1 | 9.66 | 14.93 | <3.01 | 5.28 | 328.32 | 6.57 | 10.15 | 4.35 | 5.51 | 72.63 | 148.95 | 19.75 | 70.92 |
| PP-020 | HEALTHY | 1 | 5.28 | 11.61 | 31.48 | 8.27 | 1764 | 10.41 | 160.89 | 11.38 | 3.74 | 37.12 | 745.01 | 8.45 | 677.62 |
| PP-021 | COVID | 4 | 1.26 | 2.96 | 4.95 | 21.54 | 290.29 | <1.24 | 3.43 | 1.32 | 1.63 | 3.44 | 32.16 | 4.05 | <6.57 |
| PP-022 | COVID | 1 | 2.06 | 1.64 | 7.51 | <2.25 | 889.54 | 29.2 | 22.38 | 658.39 | <1.44 | <1.98 | 64.81 | 8.73 | <6.57 |
| PP-023 | HEALTHY | 1 | 20.35 | 16.6 | 68.93 | 13.45 | 495.84 | 6.08 | 30.03 | 18.79 | 12.3 | 4.02 | 155.21 | 29.3 | 1523 |
| PP-024 | COVID | 2 | 9.23 | 12.71 | 6.02 | 7.08 | 281.32 | 2.29 | 21.49 | 1.46 | 2.88 | 11.18 | 147.81 | 9.88 | <6.57 |
| PP-025 | HEALTHY | 1 | 3.09 | 5.25 | 4.44 | 5.04 | 209.42 | 11.74 | 11.13 | <1.12 | 3.73 | 3.69 | 68.93 | 3.33 | <6.57 |
| PP-026 | COVID | 1 | <3.75 | <4.55 | 8.2 | <4.91 | 1276 | 23.93 | 12.28 | 7.14 | 2.58 | <3.75 | 538.86 | 10.7 | <24.64 |
| PP-027 | HEALTHY | 1 | 9.2 | <3.04 | <3.01 | 51.79 | 291.04 | <2.52 | 16.36 | 4.16 | 4.14 | <2.25 | 66.21 | <5.32 | <68.00 |
| PP-028 | COVID | 1 | <1.21 | <1.46 | 1.98 | <2.25 | 507.64 | 1.33 | 81.96 | 1.6 | <1.44 | 2.64 | 35.52 | 4.05 | 13.09 |

All data presented as pg/ml. < indicates that the sample was below the limit of detection for the assay. Results for PP-028 were unavailable.

**Supplementary Table 3.** Differentially expressed miRNAs in COVID patients with and without oxygen therapy compared to healthy controls.

| COVID | Log2 Fold Change | P-value | Adjusted P-value |
| --- | --- | --- | --- |
| hsa-miR-766-3p | -4.19225 | 5.21E-12 | 2.07E-09 |
| hsa-miR-106b-5p | -5.75169 | 1.18E-08 | 2.35E-06 |
| hsa-miR-99b-3p | -3.52661 | 1.94E-08 | 2.58E-06 |
| hsa-miR-1273h-3p | -3.47899 | 1.88E-06 | 0.000187 |
| hsa-let-7a-3p | -3.64017 | 7.23E-06 | 0.000575 |
| hsa-miR-6741-5p | -4.66624 | 6.12E-05 | 0.004057 |
| hsa-miR-21-3p | -3.44342 | 0.00011 | 0.00625 |
| hsa-miR-301b-3p | -6.45426 | 0.000371 | 0.015198 |
| hsa-miR-7-1-3p | -3.99909 | 0.000385 | 0.015198 |
| hsa-miR-148b-5p | -3.87087 | 0.00042 | 0.015198 |
| hsa-miR-576-5p | 2.354226 | 0.000358 | 0.015198 |
| hsa-miR-3198 | -4.41744 | 0.000482 | 0.015548 |
| hsa-miR-4662a-5p | -2.83107 | 0.000508 | 0.015548 |
| hsa-miR-6772-3p | -4.9359 | 0.00062 | 0.017631 |
| hsa-miR-197-3p | 2.047464 | 0.000746 | 0.019795 |
| hsa-miR-874-3p | -3.19538 | 0.000812 | 0.020193 |
| hsa-miR-889-3p | -2.89213 | 0.00092 | 0.02035 |
| hsa-miR-92a-3p | 1.44452 | 0.000909 | 0.02035 |
| hsa-miR-651-5p | -3.9583 | 0.001144 | 0.023966 |
| hsa-miR-500b-3p | -6.2643 | 0.001854 | 0.027356 |
| hsa-miR-769-3p | -5.6131 | 0.001856 | 0.027356 |
| hsa-miR-1468-5p | -3.69357 | 0.001529 | 0.027356 |
| hsa-miR-431-3p | -3.52784 | 0.001375 | 0.027356 |
| hsa-miR-345-5p | -2.60138 | 0.001803 | 0.027356 |
| hsa-miR-339-3p | -2.42465 | 0.001467 | 0.027356 |
| hsa-miR-103a-3p | 1.002187 | 0.001654 | 0.027356 |
| hsa-miR-30a-5p | 1.310467 | 0.001608 | 0.027356 |
| hsa-miR-6503-3p | -5.32504 | 0.001956 | 0.027809 |
| hsa-miR-4433b-5p | 1.183644 | 0.002065 | 0.028344 |
| hsa-miR-542-5p | -4.36027 | 0.002429 | 0.03222 |
| hsa-miR-627-5p | -4.89716 | 0.002562 | 0.032613 |
| hsa-miR-4750-5p | -3.32802 | 0.002786 | 0.032613 |
| hsa-miR-132-3p | -3.32335 | 0.002759 | 0.032613 |
| hsa-miR-877-5p | -1.82536 | 0.002731 | 0.032613 |
| hsa-miR-1255b-5p | -4.41336 | 0.003407 | 0.036653 |
| hsa-miR-1290 | 2.61842 | 0.003234 | 0.036653 |
| hsa-miR-450b-5p | 3.457641 | 0.003395 | 0.036653 |
| hsa-let-7f-2-3p | -4.81708 | 0.004022 | 0.041125 |
| hsa-let-7e-5p | 1.368144 | 0.00403 | 0.041125 |
| hsa-miR-30a-3p | 2.784327 | 0.004248 | 0.042272 |
| hsa-miR-23a-5p | -3.65232 | 0.005123 | 0.048547 |
| hsa-miR-215-5p | 2.852478 | 0.005076 | 0.048547 |
| COVID + Supplementary Oxygen | Log2 Fold Change | P-value | Adjusted P-value |
| hsa-miR-10a-3p | -4.14081 | 8.17E-07 | 0.000337 |
| hsa-miR-766-3p | -2.78001 | 2.36E-06 | 0.000487 |
| hsa-miR-651-5p | -4.34509 | 6.84E-05 | 0.008552 |
| hsa-miR-150-5p | -1.66873 | 8.30E-05 | 0.008552 |
| hsa-miR-4433b-5p | -1.15971 | 0.000176 | 0.012731 |
| hsa-miR-206 | 4.319059 | 0.000185 | 0.012731 |
| hsa-miR-195-5p | 2.532532 | 0.000281 | 0.016549 |
| hsa-let-7e-5p | 1.403158 | 0.000423 | 0.021765 |
| hsa-miR-320a-3p | 1.116713 | 0.000485 | 0.022202 |
| hsa-miR-483-5p | 2.778292 | 0.000685 | 0.028224 |
| hsa-miR-5189-3p | -4.60876 | 0.000869 | 0.032109 |
| hsa-miR-98-5p | 1.053429 | 0.000935 | 0.032109 |
| hsa-miR-200c-3p | 1.127342 | 0.001488 | 0.047153 |
| hsa-miR-664b-3p | -4.41473 | 0.001729 | 0.047479 |
| hsa-miR-96-5p | -3.88486 | 0.001725 | 0.047479 |

Green shading indicates DE miRNAs common to both comparisons.


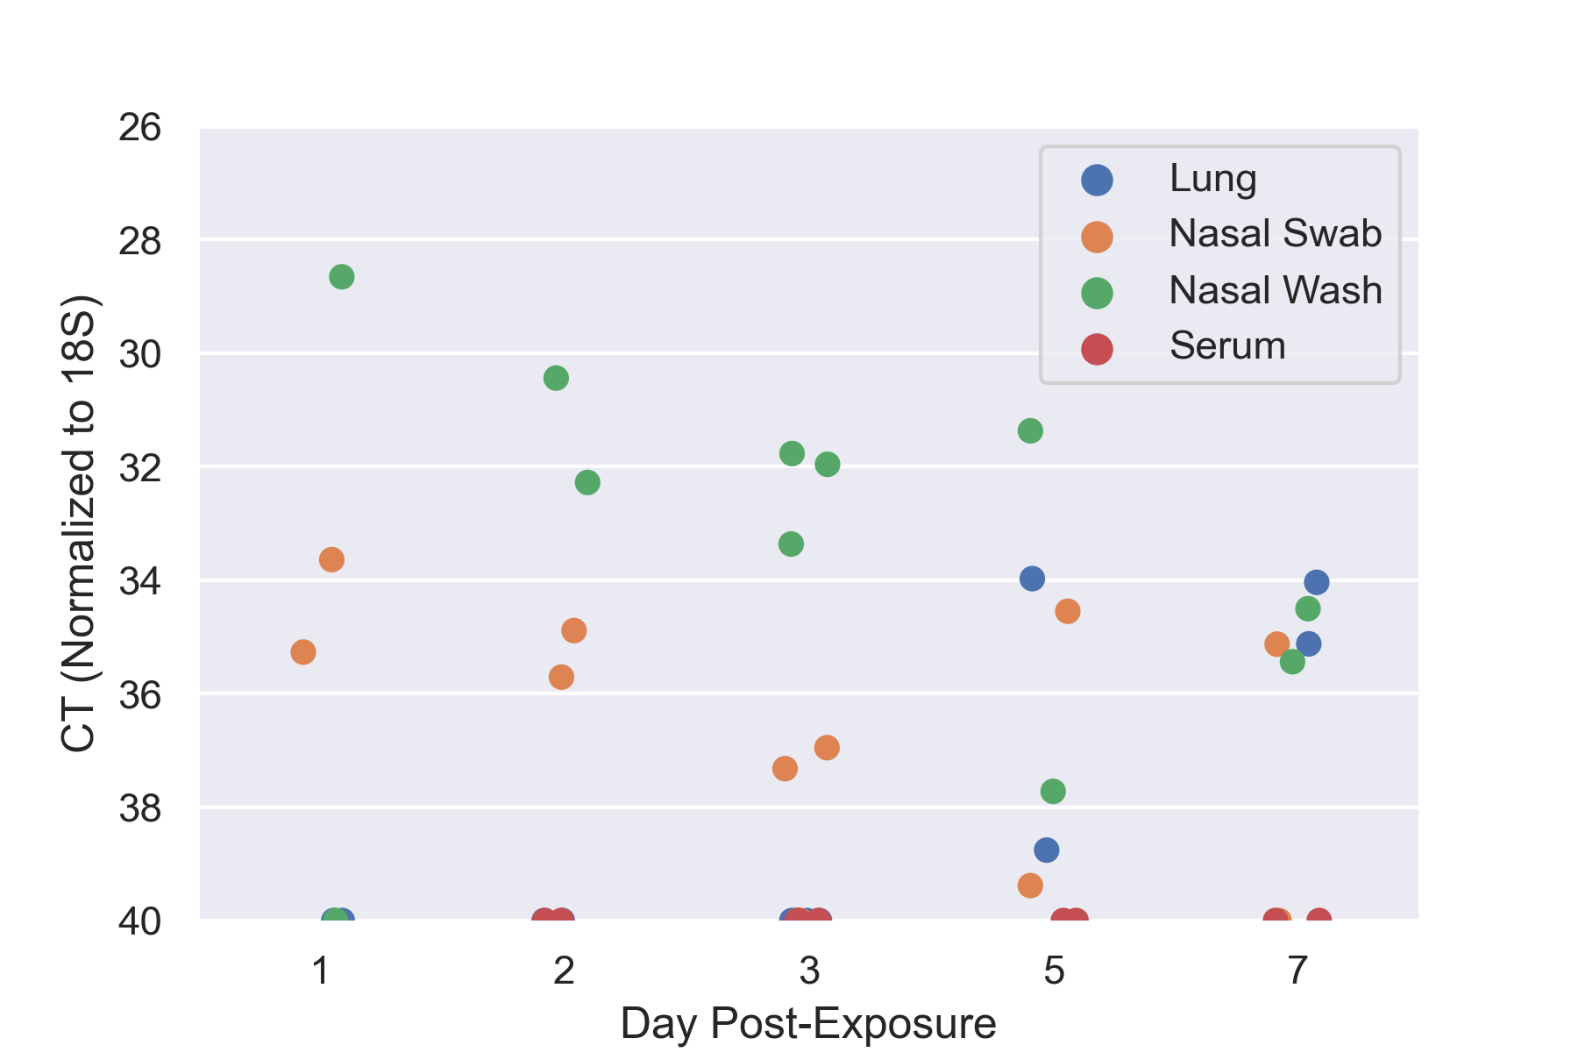


**Supplementary Figure 3.** Detection of influenza (H1N1) genomic RNA in lung tissue (blue), nasal swab (orange), nasal wash (green) and serum (red) of infected ferrets (2-4 ferrets per time point). Data is presented as normalized CT on a reverse y-axis. Undetectable results are plotted as CT=40.

**Supplementary Table 4.** Differentially expressed miRNAs in ferrets infected with SARS-CoV-2 compared to uninfected ferrets.

| MicroRNA | Log2 Fold Change | P-value | Adjusted P-value |
| --- | --- | --- | --- |
| hsa-miR-92a-3p | -3.40243 | 2.77E-51 | 8.32E-49 |
| hsa-miR-486-5p | -4.56453 | 4.00E-50 | 6.00E-48 |
| hsa-miR-30e-5p | 2.220567 | 9.42E-31 | 9.42E-29 |
| hsa-miR-423-5p | -2.49659 | 2.47E-30 | 1.86E-28 |
| hsa-miR-141-3p | 4.102239 | 2.60E-23 | 1.56E-21 |
| hsa-miR-128-3p | -1.81219 | 2.07E-14 | 1.03E-12 |
| hsa-miR-210-3p | 4.141206 | 2.84E-14 | 1.22E-12 |
| hsa-miR-1-3p | 4.035272 | 1.15E-13 | 4.33E-12 |
| hsa-miR-500a-3p | 2.387716 | 2.64E-11 | 8.80E-10 |
| hsa-let-7b-5p | -1.33777 | 1.59E-10 | 4.35E-09 |
| hsa-miR-22-3p | 2.434372 | 1.50E-10 | 4.35E-09 |
| hsa-miR-3661 | 18.47553 | 2.10E-10 | 5.25E-09 |
| hsa-miR-24-3p | 1.736326 | 3.73E-10 | 8.61E-09 |
| hsa-miR-340-5p | 3.633067 | 7.96E-10 | 1.71E-08 |
| hsa-miR-574-5p | 3.125416 | 2.53E-09 | 5.06E-08 |
| hsa-let-7e-5p | 2.636013 | 4.96E-09 | 9.29E-08 |
| hsa-miR-378c | 3.648634 | 5.47E-09 | 9.65E-08 |
| hsa-miR-221-3p | 1.592029 | 7.81E-09 | 1.30E-07 |
| hsa-miR-181c-3p | 4.132007 | 8.35E-09 | 1.32E-07 |
| hsa-miR-30a-5p | 2.007322 | 1.96E-08 | 2.94E-07 |
| hsa-miR-130a-3p | 4.152037 | 2.72E-08 | 3.89E-07 |
| hsa-miR-1306-3p | -1.94074 | 5.95E-08 | 8.11E-07 |
| hsa-miR-95-3p | 2.570983 | 7.48E-08 | 9.76E-07 |
| hsa-miR-146a-5p | 1.378139 | 1.09E-07 | 1.36E-06 |
| hsa-miR-195-5p | 3.626193 | 1.23E-07 | 1.48E-06 |
| hsa-miR-27b-3p | 1.188622 | 1.82E-07 | 2.10E-06 |
| hsa-miR-425-5p | -1.38106 | 2.67E-07 | 2.97E-06 |
| hsa-miR-9-5p | -7.20819 | 2.97E-07 | 3.18E-06 |
| hsa-miR-30a-3p | 4.165755 | 6.49E-07 | 6.71E-06 |
| hsa-miR-4454 | 2.633807 | 9.61E-07 | 9.61E-06 |
| hsa-miR-148b-3p | -1.48248 | 1.18E-06 | 1.14E-05 |
| hsa-miR-599 | 4.236388 | 1.50E-06 | 1.40E-05 |
| hsa-miR-379-5p | 4.442619 | 2.48E-06 | 2.25E-05 |
| hsa-miR-142-5p | 1.209372 | 2.78E-06 | 2.45E-05 |
| hsa-miR-451a | -1.97605 | 4.74E-06 | 3.95E-05 |
| hsa-miR-191-3p | 2.163531 | 4.70E-06 | 3.95E-05 |
| hsa-miR-223-5p | 2.236282 | 6.54E-06 | 5.30E-05 |
| hsa-miR-196b-5p | 2.122202 | 1.08E-05 | 8.54E-05 |
| hsa-miR-194-5p | 1.517522 | 1.13E-05 | 8.69E-05 |
| hsa-let-7d-5p | 1.566595 | 2.20E-05 | 0.000165 |
| hsa-miR-324-3p | -1.88195 | 3.07E-05 | 0.000219 |
| hsa-miR-186-5p | -1.12431 | 3.00E-05 | 0.000219 |
| hsa-miR-502-3p | 1.625416 | 3.37E-05 | 0.000235 |
| hsa-miR-423-3p | -1.28775 | 6.88E-05 | 0.000463 |
| hsa-miR-151b | 3.246396 | 6.94E-05 | 0.000463 |
| hsa-miR-760 | 1.672519 | 8.44E-05 | 0.00055 |
| hsa-miR-93-3p | -2.0878 | 8.93E-05 | 0.00057 |
| hsa-miR-382-5p | 4.329109 | 0.000131 | 0.000818 |
| hsa-miR-25-3p | -1.17445 | 0.000143 | 0.000877 |
| hsa-miR-331-3p | 3.140441 | 0.000175 | 0.001048 |
| hsa-miR-29c-3p | -1.31867 | 0.000212 | 0.001247 |
| hsa-miR-320a-3p | 0.83899 | 0.00023 | 0.001328 |
| hsa-miR-1277-5p | 3.844184 | 0.000264 | 0.001494 |
| hsa-miR-320d | 1.458544 | 0.000344 | 0.001913 |
| hsa-miR-769-5p | -1.67987 | 0.000359 | 0.001961 |
| hsa-miR-320c | 1.215624 | 0.000399 | 0.002136 |
| hsa-miR-3064-5p | 3.447122 | 0.000416 | 0.00219 |
| hsa-miR-197-3p | -1.90611 | 0.000436 | 0.002258 |
| hsa-miR-6529-5p | 1.035497 | 0.00052 | 0.002644 |
| hsa-miR-146b-5p | 1.779472 | 0.000568 | 0.002841 |
| hsa-miR-151a-3p | 0.94682 | 0.000617 | 0.003035 |
| hsa-miR-378a-5p | 2.322497 | 0.00063 | 0.00305 |
| hsa-miR-18a-3p | -3.53688 | 0.000659 | 0.003137 |
| hsa-miR-27a-3p | 1.292027 | 0.000791 | 0.003709 |
| hsa-miR-503-5p | -1.58755 | 0.000911 | 0.004206 |
| hsa-miR-192-5p | 1.624728 | 0.000982 | 0.004465 |
| hsa-miR-10a-3p | 3.552578 | 0.001061 | 0.00475 |
| hsa-miR-147b-3p | 2.605864 | 0.001262 | 0.005566 |
| hsa-miR-182-5p | 2.355723 | 0.00142 | 0.006173 |
| hsa-miR-409-3p | 3.702095 | 0.00147 | 0.0063 |
| hsa-miR-885-3p | 3.28422 | 0.001508 | 0.006372 |
| hsa-miR-450b-5p | -3.14202 | 0.001579 | 0.006487 |
| hsa-miR-106b-3p | -1.19454 | 0.001564 | 0.006487 |
| hsa-miR-215-5p | 1.118426 | 0.001663 | 0.006744 |
| hsa-miR-125a-3p | 3.884957 | 0.001698 | 0.006794 |
| hsa-miR-542-3p | 2.479661 | 0.001726 | 0.006812 |
| hsa-miR-30d-5p | 0.556115 | 0.001796 | 0.006997 |
| hsa-miR-432-5p | 2.872645 | 0.001856 | 0.007137 |
| hsa-miR-342-3p | -1.13623 | 0.001999 | 0.007592 |
| hsa-let-7f-5p | 0.705477 | 0.00208 | 0.0078 |
| hsa-miR-200a-3p | 1.697966 | 0.002144 | 0.007942 |
| hsa-miR-30e-3p | 2.553678 | 0.002823 | 0.010328 |
| hsa-miR-21-3p | 3.818532 | 0.003966 | 0.014335 |
| hsa-miR-1843 | 2.786565 | 0.004319 | 0.015426 |
| hsa-miR-150-5p | -1.59146 | 0.005053 | 0.017835 |
| hsa-miR-320b | 0.883137 | 0.00622 | 0.021696 |
| hsa-miR-26b-3p | 2.499836 | 0.006974 | 0.024047 |
| hsa-miR-26b-5p | 0.892899 | 0.007316 | 0.02494 |
| hsa-miR-499a-5p | 2.118508 | 0.007585 | 0.025566 |
| hsa-miR-200b-5p | 3.430621 | 0.008099 | 0.026997 |
| hsa-miR-125b-1-3p | 3.56792 | 0.008649 | 0.028515 |
| hsa-miR-10b-5p | -1.33314 | 0.00912 | 0.029738 |
| hsa-miR-219a-1-3p | 3.594186 | 0.010575 | 0.034112 |
| hsa-miR-885-5p | 3.723072 | 0.011075 | 0.035346 |
| hsa-miR-574-3p | 1.958175 | 0.011467 | 0.036212 |
| hsa-miR-15b-3p | -1.17185 | 0.012126 | 0.037894 |
| hsa-miR-449a | -7.85645 | 0.012722 | 0.038944 |
| hsa-let-7b-3p | 3.199181 | 0.012693 | 0.038944 |
| hsa-miR-32-5p | 2.424765 | 0.013387 | 0.040567 |
| hsa-miR-339-5p | 0.562952 | 0.014345 | 0.042639 |
| hsa-miR-130b-3p | 0.975159 | 0.014355 | 0.042639 |
| hsa-miR-2114-5p | -4.79594 | 0.016771 | 0.048848 |
| hsa-miR-19a-3p | 1.142888 | 0.016749 | 0.048848 |

Green shading indicates DE miRNAs that were also found in human patient plasma samples.

**Supplementary Table 5. Other statistical comparisons**

| Table or Figure | Comparison | Test | Statistic | P-value |
| --- | --- | --- | --- | --- |
| Table 1 | HEALTHY vs COVID-19 gender frequency | Chi-square | 0 | 1 |
| Table 1 | HEALTHY vs COVID-19 age distribution | Normal distribution | 3.7193 | 0.1557 |
| Table 1 | HEALTHY vs COVID-19 age distribution | Two-sided t-test | 0.0642 | 0.9495 |
| Figure 1 | HEALTHY vs COVID-19 miR-4662a abundance | One-sided Mann-Whitney U | 68 | 0.0073 |
| Figure 1 | HEALTHY vs COVID-19 miR-766-3p abundance | One-sided Mann-Whitney U | 66 | 0.0117 |
| Figure 1 | HEALTHY vs COVID-19 IL-6 abundance | Normal distribution | 3.3598 | 0.1864 |
| Figure 1 | HEALTHY vs COVID-19 IL-6 abundance | One-sided t-test | -3.3245 | 0.0021 |
